# Supplementary material
Source: Royal Society of Chemistry journal article supplement (doi:10.1039/d6cp00750c)
Supplement: d6cp00750c1.pdf [file d6cp00750c1.pdf]

## Supporting Information

### **The influence of sintering temperature on thermoelectric and mechanical performance of n-type Mg<sub>3</sub>Sb<sub>2</sub>-based materials**

Shuai Zhang<sup>1,2+</sup>, Jiaqi Zhang<sup>3,4,+</sup>, Yuan Liu,<sup>1</sup> Juan Li<sup>1,\*</sup>, Tingting Chen<sup>1</sup>, Qidong Wang<sup>1,5</sup>, Lianzhen Cao<sup>1</sup>, Yujie Zong<sup>6</sup> and Bing Sun<sup>1,\*</sup>

<sup>1</sup>School of Physics and Electronic Information, Weifang University, Weifang, 261061, PR China

<sup>2</sup>Jinan Key Laboratory of X-ray Optics, Jinan, 250000, PR China

<sup>3</sup>Henan Key Laboratory of Diamond Optoelectronic Materials and Devices, Key Laboratory of Materials Physics, Ministry of Education, and School of Physics, Zhengzhou University, Zhengzhou, 450052, PR China

<sup>4</sup>Institute of Quantum Materials and Physics, Henan Academy of Sciences, Zhengzhou, 450046, PR China

<sup>5</sup>Key Laboratory of Low-Dimensional Structural Physics and Application, Education Department of Guangxi Zhuang Autonomous Region, College of Physics and Electronic Information Engineering, Guilin University of Technology, Guilin, 541004, PR China

<sup>6</sup>School of Physics, State Key Laboratory of Crystal Materials, Shandong University, Jinan, 250100, PR China

<sup>+</sup>These authors contributed equally to this work.

**Corresponding authors:**

\*Emails: [lj\\_wfu@163.com](mailto:lj_wfu@163.com) (Juan Li); [20170005@wfu.edu.cn](mailto:20170005@wfu.edu.cn) (Bing Sun)

## Supplementary Figures

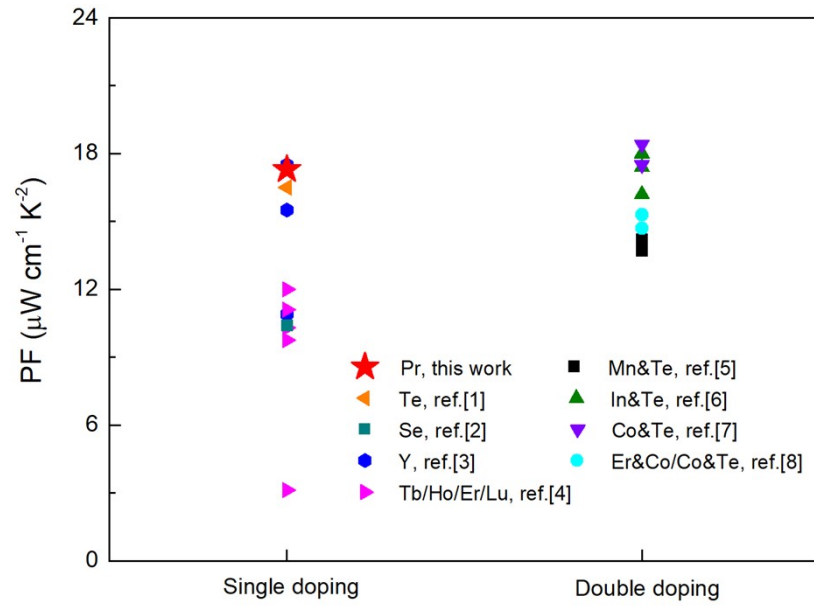

**Fig. S1.** Comparison of the peak power factor at 725 K obtained in this work with those of other Mg<sub>3</sub>Sb<sub>2</sub>-based materials reported in recent literature [1-8], including both singly doped and doubly doped Mg<sub>3+x</sub>(Sb,Bi)<sub>2</sub> samples.

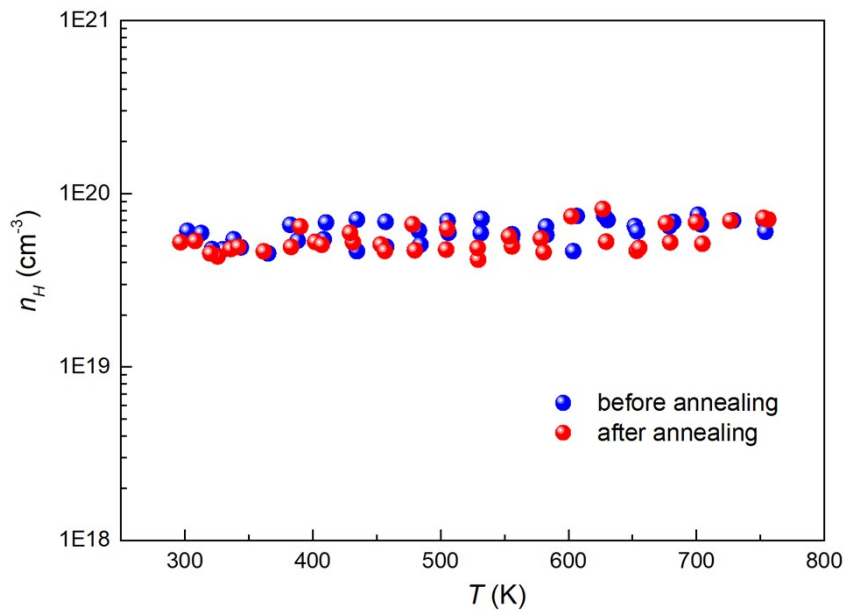

**Fig. S2.** Carrier concentration as a function of temperature for Mg<sub>3.2</sub>Pr<sub>0.03</sub>Sb<sub>1.5</sub>Bi<sub>0.5</sub> sample prepared by hot-press sintering at 923 K before and after annealing process at 725 K for 60 h.

## References

- [1] Z. Liang, M. Jian, C. Xu, et al. Intrinsic thermal stability enhancement in n-type  $\text{Mg}_3\text{Sb}_2$  thermoelectrics toward practical applications. *Acta Mater.* 2023, 247, 118752.
- [2] J. Zhang, L. Song, A. Mamakhel, et al. High performance low-cost n-type Se-doped  $\text{Mg}_3\text{Sb}_2$ -based Zintl compounds for thermoelectric application, *Chem. Mater.* 2017, 29, 5371.
- [3] S. Song, J. Mao, M. Bordelon, et al. Joint effect of magnesium and yttrium on enhancing thermoelectric properties of n-type Zintl  $\text{Mg}_{3+x}\text{Y}_{0.02}\text{Sb}_{1.5}\text{Bi}_{0.5}$ , *Mater. Today Phys.* 2019, 8, 25.
- [4] J.-I. Tani, H. Ishikawa. Thermoelectric properties of rare-earth-doped  $\text{Mg}_3\text{Sb}_2$  synthesized in a one-step process via pulsed electric current sintering. *Solid State Sci.* 2025, 168, 108045.
- [5] J.-X. Liang, L. Yu, S.-T. Luo, et al. Synergistic optimization of the thermoelectric transport properties of  $\text{Mg}_3\text{Sb}_2$  through Dy/Tm doping combined with S compensation strategy. *ACS Appl. Energy Mater.* 2025, 8, 12760-12768.
- [6] L. Wang, W. Zhang, S. Y. Back, et al. High-performance  $\text{Mg}_3\text{Sb}_2$ -based thermoelectrics with reduced structural disorder and microstructure evolution. *Nat. Commun.* 2024, 15, 6800.
- [7] Y. Chen, H. Shang, X. Wang, et al. Simultaneously improved thermoelectric performance and thermal stability for n-type  $\text{Mg}_3\text{Sb}_2$ -based alloys via synergy of elemental Mg and Co doping. *Rare Met.* 2025, 44, 7809.
- [8] H. Shang, Q. Zou, L. Zhang, et al. Improving thermal stability and revealing physical mechanism in n-type  $\text{Mg}_3\text{Sb}_{2-x}\text{Bi}_x$  for practical applications. *Nano Energy* 2023, 109, 108270.
